# Supplementary material for: Near-infrared photothermal therapy of chiral Au helicoids with broadband optical absorption
Source: Royal Society of Chemistry journal article supplement (doi:10.1039/d2nj03779c), 2022-12-01
Supplement: d2nj03779c1.pdf [file d2nj03779c1.pdf]

## Supporting Information

### Near-Infrared Photothermal Therapy of Chiral Au Helicoids with a Broadband Optical Absorption

Yulong Weng,<sup>a</sup> Qian Wang,<sup>a</sup> Cong Zhang,<sup>b</sup> Yulu He,<sup>\*a</sup> Xia Ran,<sup>b</sup> Yanmin Kuang,<sup>a</sup> Renming Liu,<sup>a</sup> and Lijun Guo,<sup>\*b</sup>

<sup>a</sup> Academy for Advanced Interdisciplinary Studies, State Key Laboratory of Crop Stress Adaptation and Improvement, School of Physics and Electronics, Henan University, Kaifeng 475004, China.

<sup>b</sup> International Joint Research Laboratory of New Energy Materials and Devices of Henan Province, School of Physics and Electronics, Henan University, Kaifeng 475004, China.

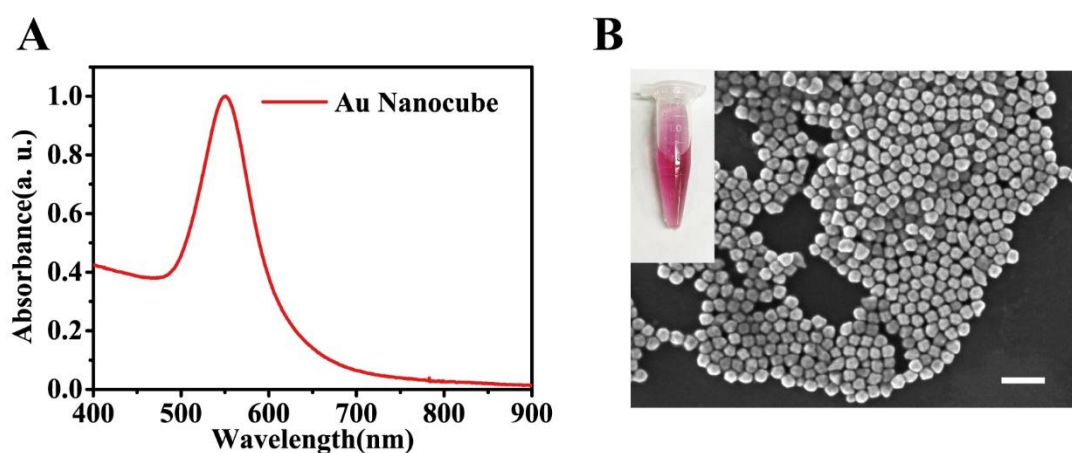

**Figure S1.** (a) UV-Vis-NIR absorption spectrum and (b) SEM image of Au cubic seeds. (Scale bar=100 nm.) The inserting is the digital image of Au cubic solution

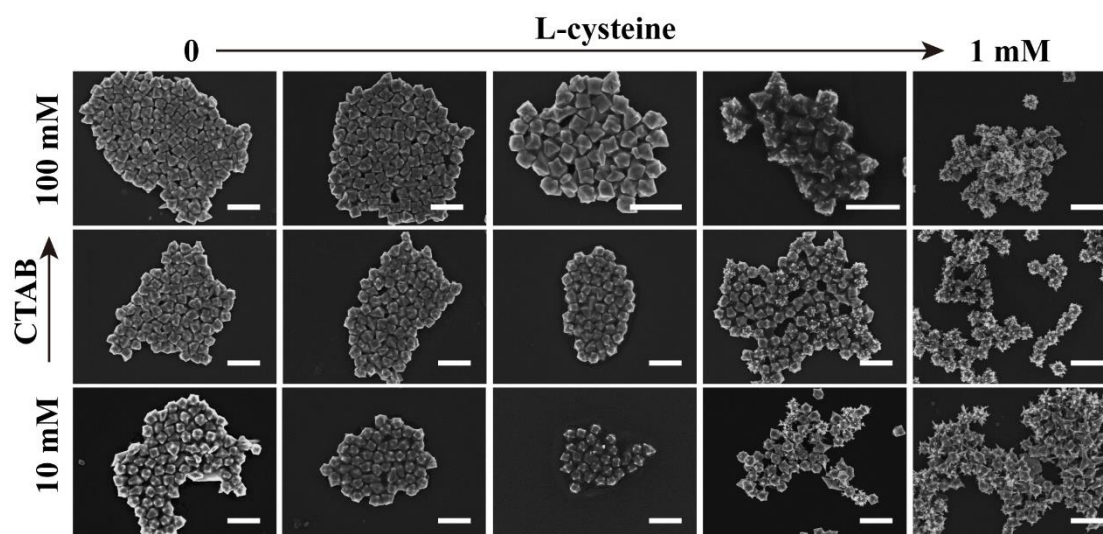

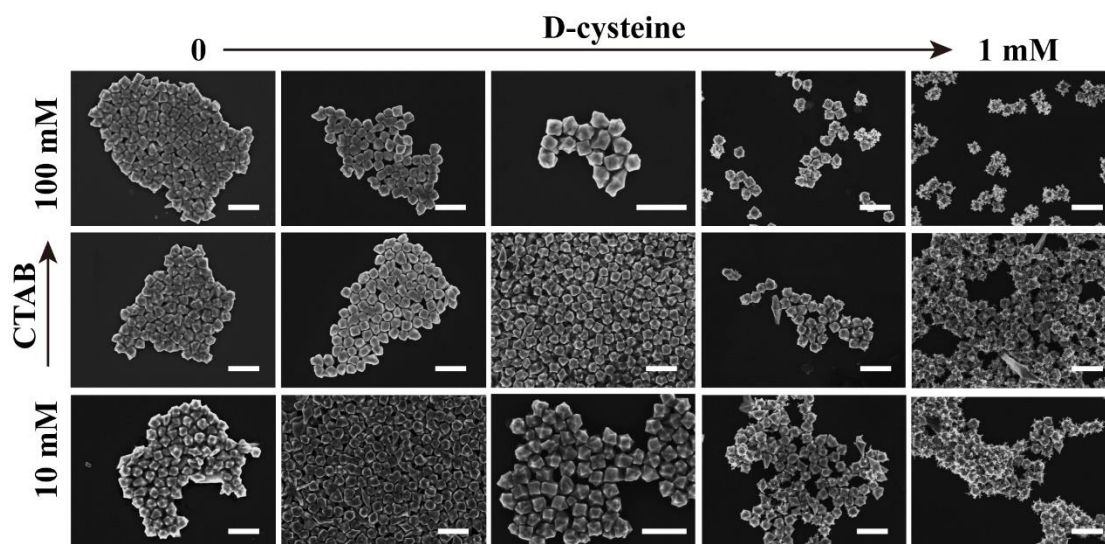

Figure S2. SEM images of Au nanoparticles (NPs) synthesized under various concentration combinations of CTAB and cysteine. (Scale bar=500 nm.)

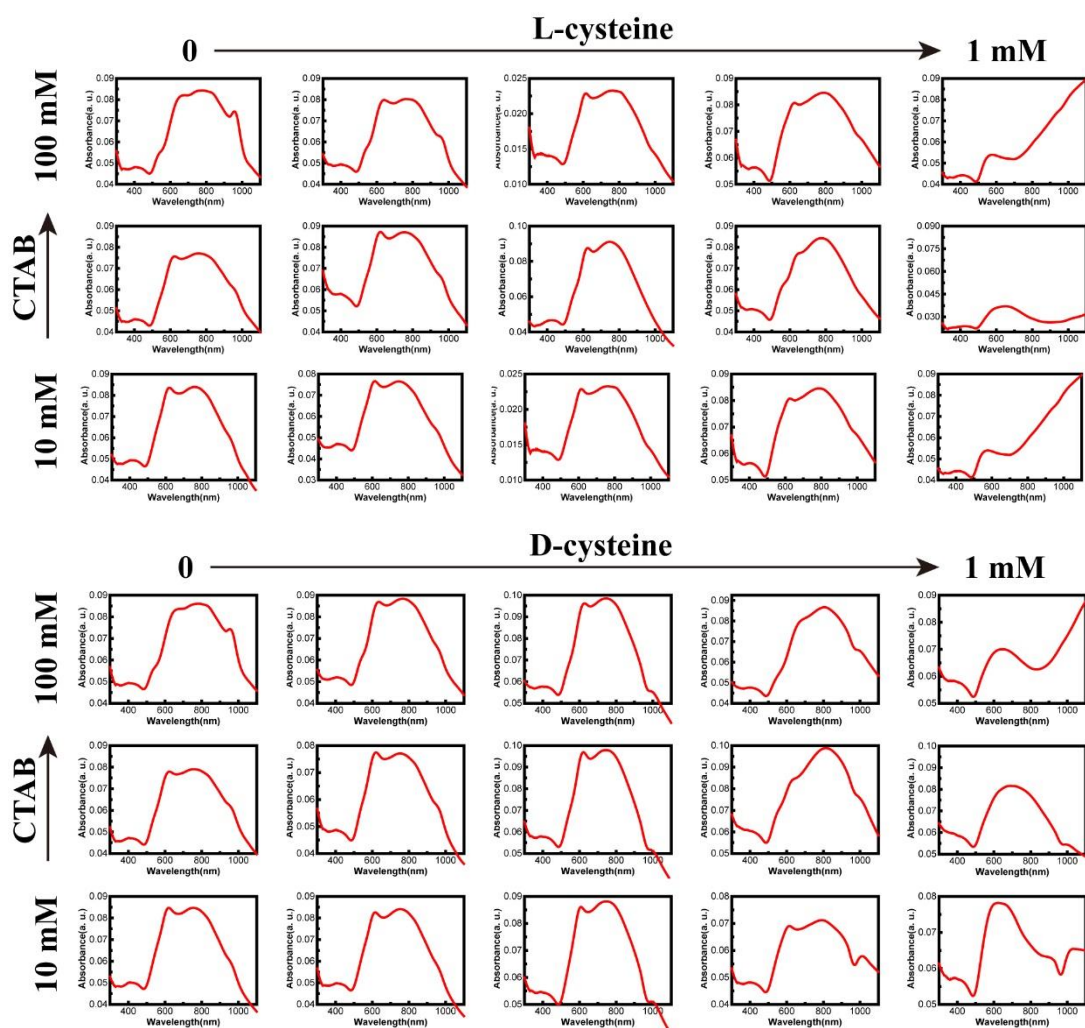

Figure S3. UV-vis-NIR absorption spectrum of Au NPs synthesized under various concentration combinations of CTAB and cysteine.

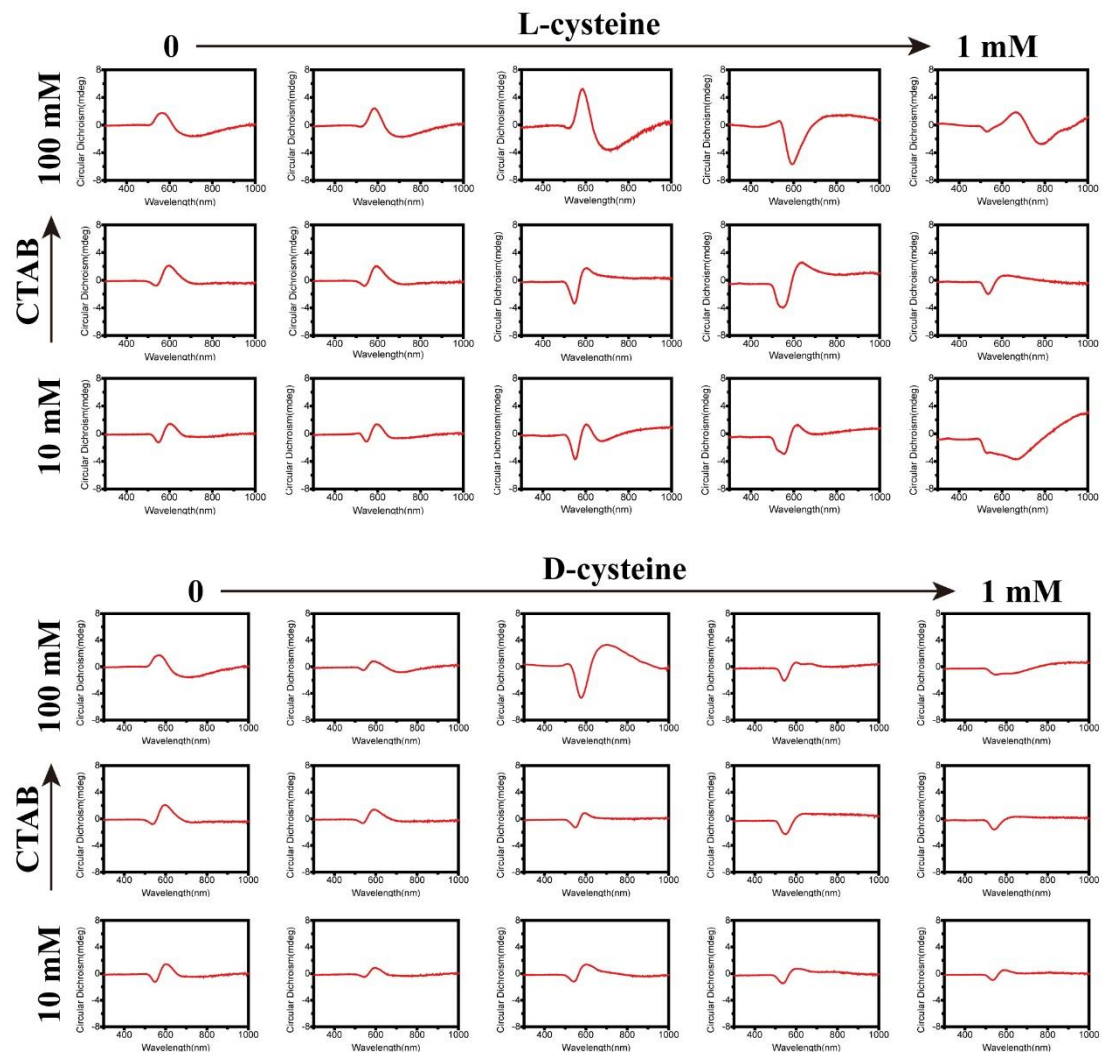

**Figure S4.** CD spectra of Au NPs synthesized under various concentration combinations of CTAB and cysteine.

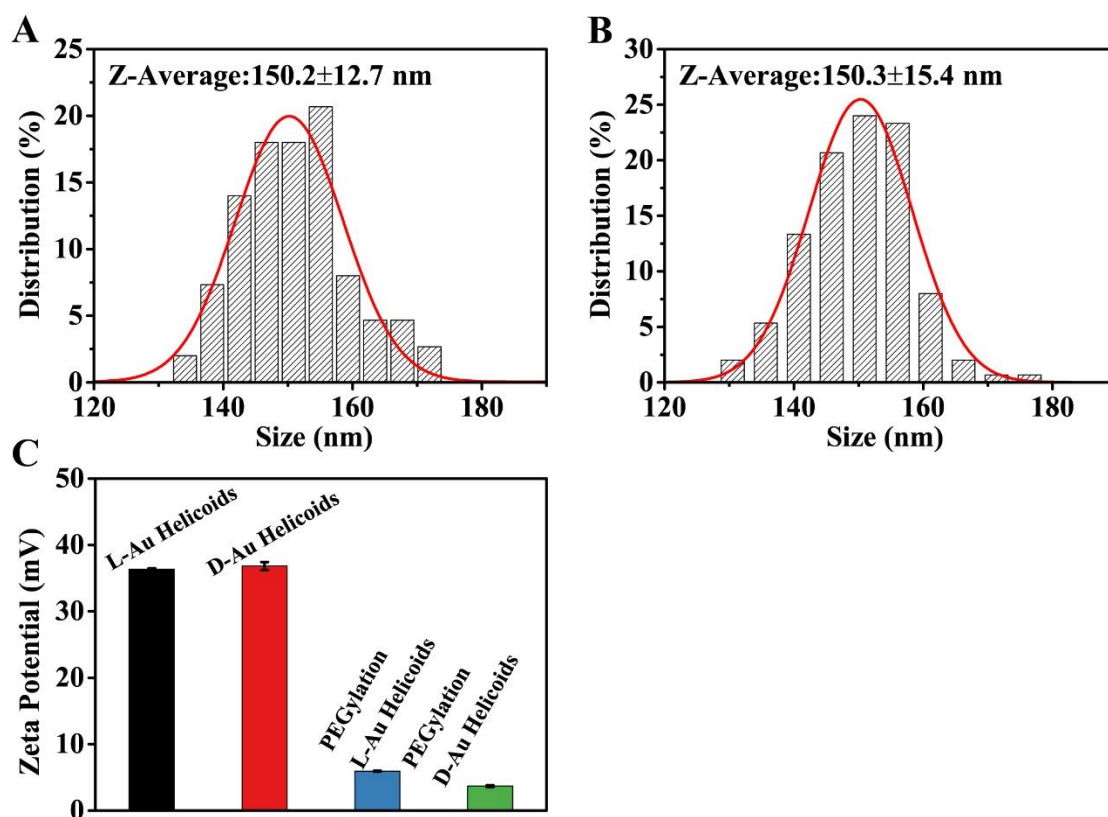

**Figure S5.** The statistical distribution of the side length of (a) L-Au Helicoids and (b) D-Au Helicoids. (c) Zeta potential of L/D-Au Helicoids and PEGylation L/D-Au Helicoids.

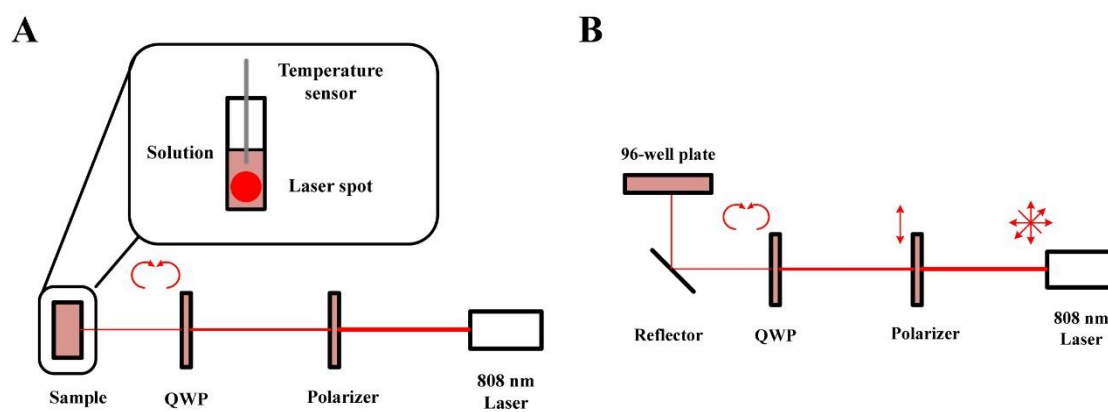

**Figure S6.** Optical circuit diagram of (a) photothermal performance assay and (b) in vitro PTT assay under 808 nm CPL irradiation.

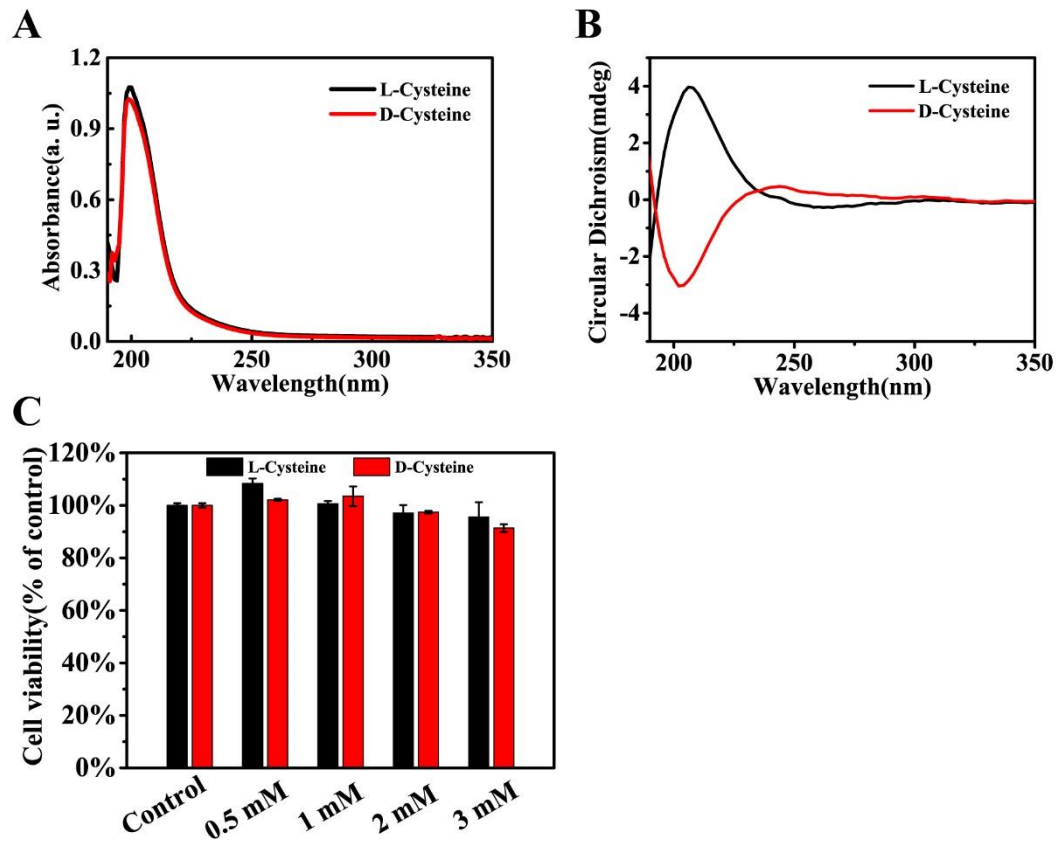

**Figure S7.** (a) UV-vis absorption and (b) CD spectra of L/D-cysteine. (c) Viability of HeLa cells treated with different concentrations of L/D-cysteine without laser radiation.
